# Supplementary material for: MiR-199a Inhibits Secondary Envelopment of Herpes Simplex Virus-1 Through the Downregulation of Cdc42-specific GTPase Activating Protein Localized in Golgi Apparatus
Source: PubMed Central journal article supplement (PMC5532371; doi:10.1038/s41598-017-06754-3), 2017-07-27
Supplement: 41598_2017_6754_MOESM1_ESM.pdf [file 41598_2017_6754_MOESM1_ESM.pdf]

## **Supplementary Information**

### **MiR-199a Inhibits Secondary Envelopment of Herpes Simplex Virus-1 Through the Downregulation of Cdc42-specific GTPase Activating Protein Localized in Golgi Apparatus**

Kyousuke Kobayashi, Fumiko Suemasa, Hiroshi Sagara, Shinya Nakamura, Yasushi Ino,

Kazuyoshi Kobayashi, Hiroaki Hiramatsu, Takeshi Haraguchi, Kazuo Kurokawa, Tomoki

Todo, Akihiko Nakano, and Hideo Iba

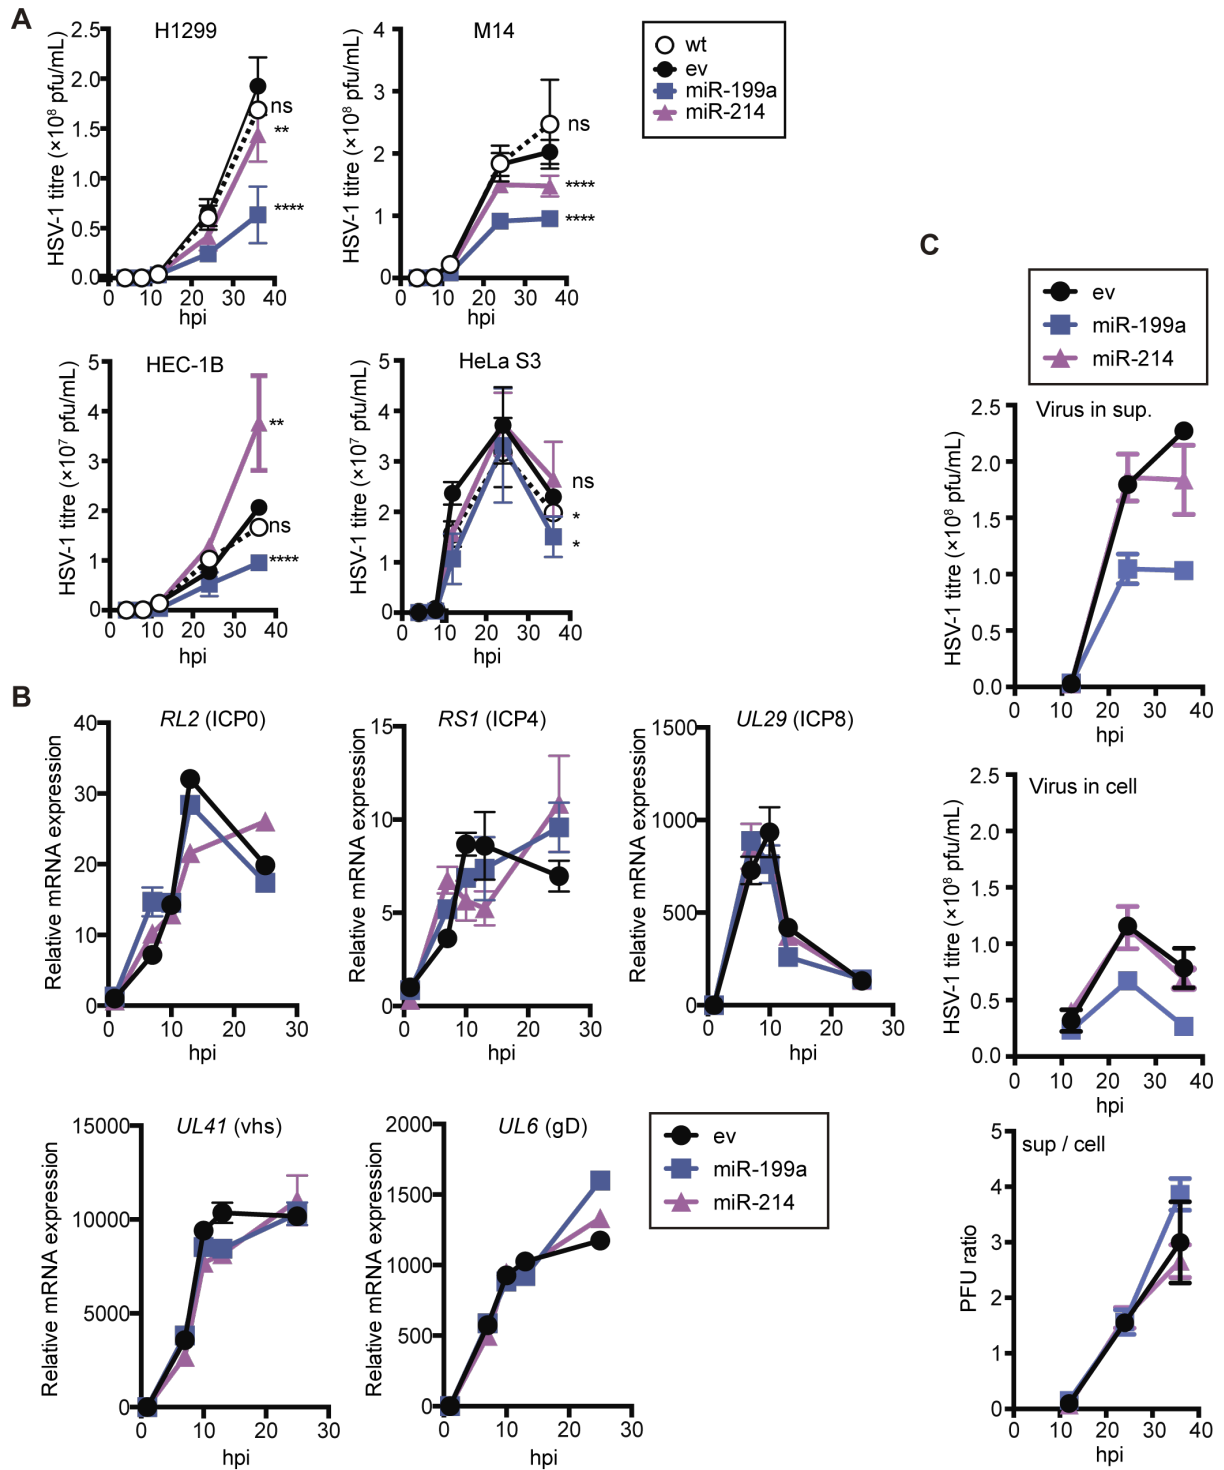

**Supplementary Figure S1 MiR-199a-5p and miR-199a-3p inhibit HSV-1 replication in various human cell lines.** (A) Four human cell lines (H1299, M14, HEC-1B, and HeLa S3)

transfected with control (ev) and pre-miRNA-expressing lentivirus vector were infected with HSV-1 at an moi of 5. HSV-1 titres in the cell culture supernatant and the extracts from the cells were determined by plaque assay at 4, 8, 12, 24, and 36 hpi. (B) HSV-1 mRNA analysis by qRT-PCR analysis. A549 cells transfected with control (ev) and pre-miRNA-expressing lentivirus vector were infected with HSV-1 at an moi of 5 and total RNA was extracted for the quantification of immediate early (*RL2* [ICP0] and *RS1* [ICP4]), early (*UL29* [ICP8]), and late (*UL41* [vhs] and *US6* [gD]) genes at 1, 7, 10, 13, 25 hpi. 18S ribosomal RNA was used as an internal control. The data represent the means  $\pm$  s.d. ( $n=3$ ). (C) The HSV-1 titer of supernatant and of infected cells and the ratio between them in HSV-1 infected (moi of 5) A549 cells transduced with a control (EV) or a pre-miRNA-expressing lentivirus vector at 12, 24, and 36 hpi. The asterisks indicate the  $p$  value (two-way ANOVA) compared with control (ev). ns, not significant. \* $p<0.05$ , \*\* $p<0.01$ , \*\*\*\* $p<0.001$ .

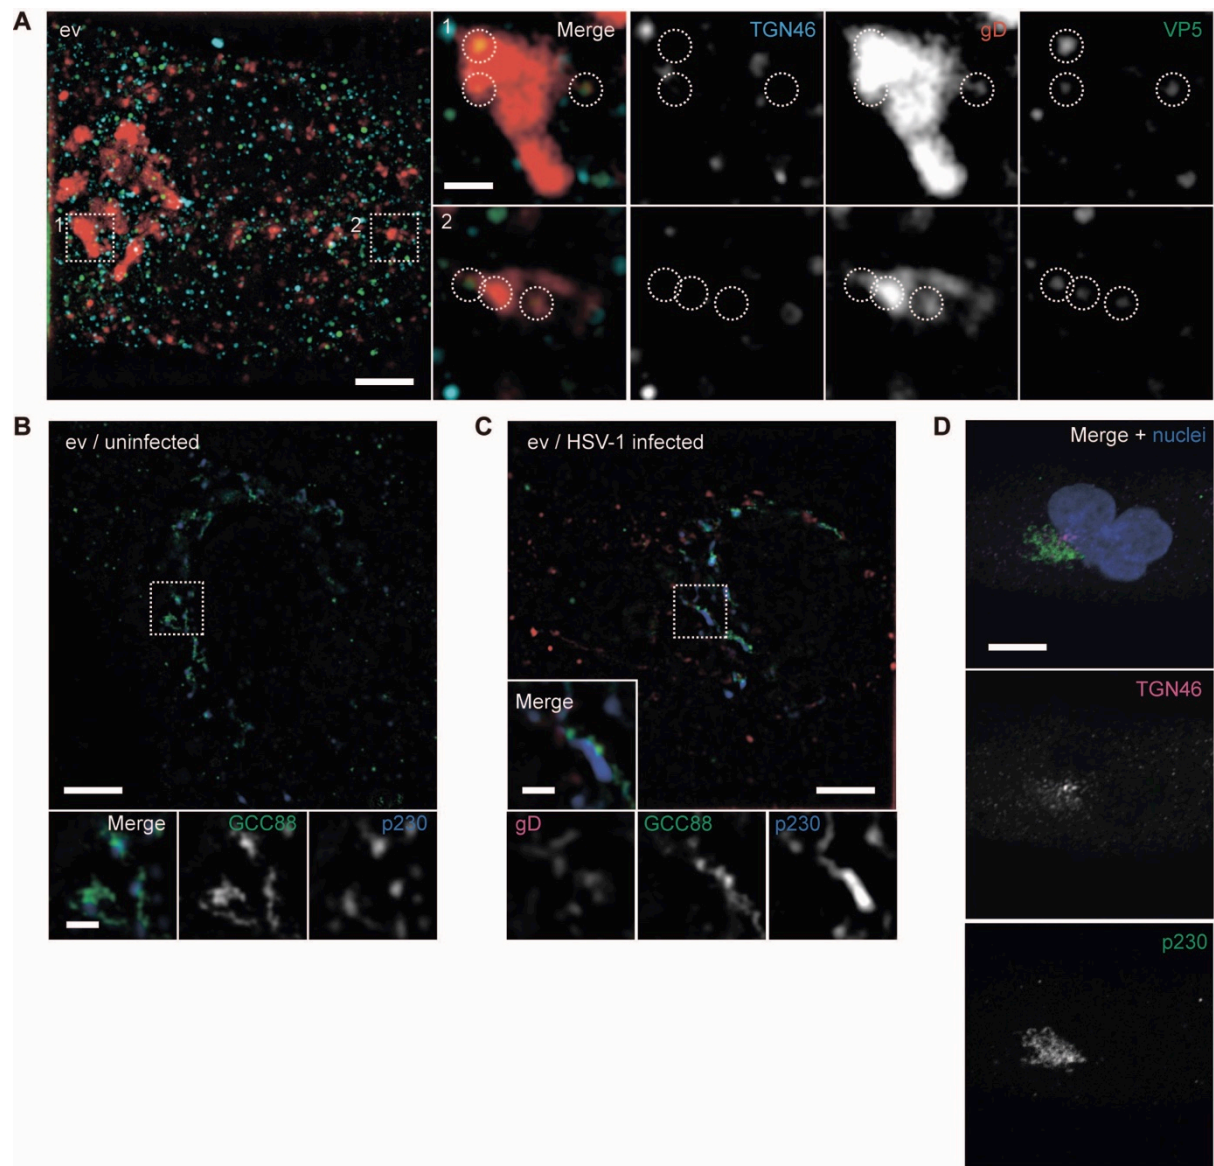

**Supplementary Figure S2 Localization of TGN and *trans*-Golgi markers in**

**HSV-1-infected or uninfected A549 cells.** (A) Representative super-resolution images of HSV-1-infected A549 cells (moi of 5/12 hpi) transfected with control (ev) lentivirus vector. Cells were stained with anti-gD antibody (red), anti-VP5 antibody (green), and anti-TGN46 antibody (cyan). The furthest left panel shows a z-stack image reconstructed by maximum

intensity projection (bars, 5  $\mu\text{m}$ ) and the other panels show magnifications of the two areas boxed with dashed lines (1,2) in the left panel (bars, 1  $\mu\text{m}$ ). The circles indicate capsids associated with or included in gD-positive membrane compartments. (B and C)

Representative super-resolution images of uninfected A549 (B) or HSV-1-infected A549 cells (C) (moi of 5/12 hpi) transfected with control (EV) lentivirus vector. Cells were stained with anti-GCC88 antibody (green) and anti-p230 antibody (blue). In HSV-1-infected cells, gD was also stained (C, red). The upper panels show z-stack images reconstructed by maximum intensity projection (bars, 5  $\mu\text{m}$ ) and the lower panels show magnifications of the areas boxed with dashed lines in the upper panels (bars, 1  $\mu\text{m}$ ). (D) Representative confocal microscopy images of A549 cells stained with anti-TGN46 antibody (magenta), anti-p230 antibody (green), and DAPI (blue) (bars, 5  $\mu\text{m}$ ).

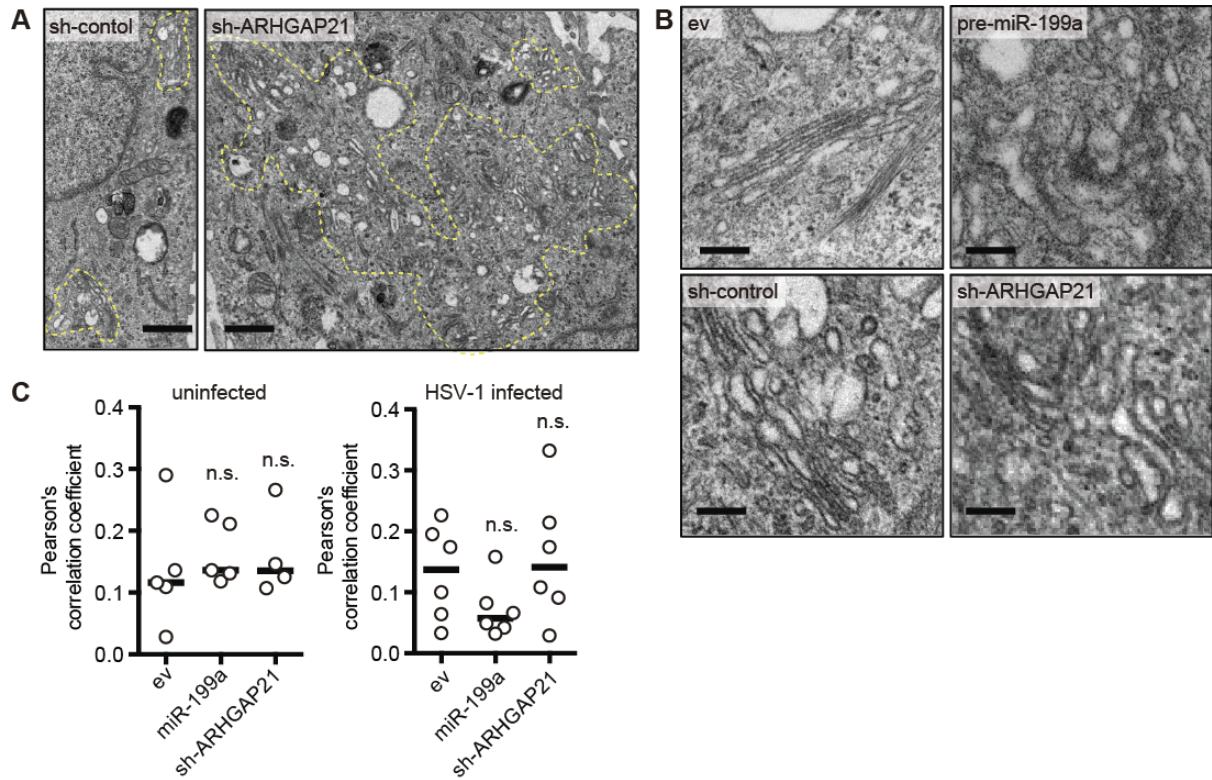

### Supplementary Figure S3 MiR-199a alters the morphology of the Golgi cisternae

**without affecting their identity.** (A and B) Representative transmission electron

micrographs of A549 cells transduced with sh-control-, sh-ARHGAP21#01-, control (ev)-,

and pre-miR-199a-expressing lentivirus vector (bars in A, 1  $\mu$ m; bars in B, 200 nm). In A, the

areas enclosed by the dashed yellow lines indicate the Golgi apparatus. (C) Quantification of

the colocalization of p230 (*trans*-Golgi) with giantin (medial- and *cis*-Golgi). Using

super-resolution images of uninfected or HSV-1-infected (moi of 5/12 hpi) A549 cells

transfected with control (ev), pre-miR-199a-, or sh-ARHGAP21#01-expressing lentivirus

vector, Pearson's correlation coefficients were determined. In C, the bars represent the

medians and n.s. indicates no significant difference compared with control (ev) by  $t$ -test.



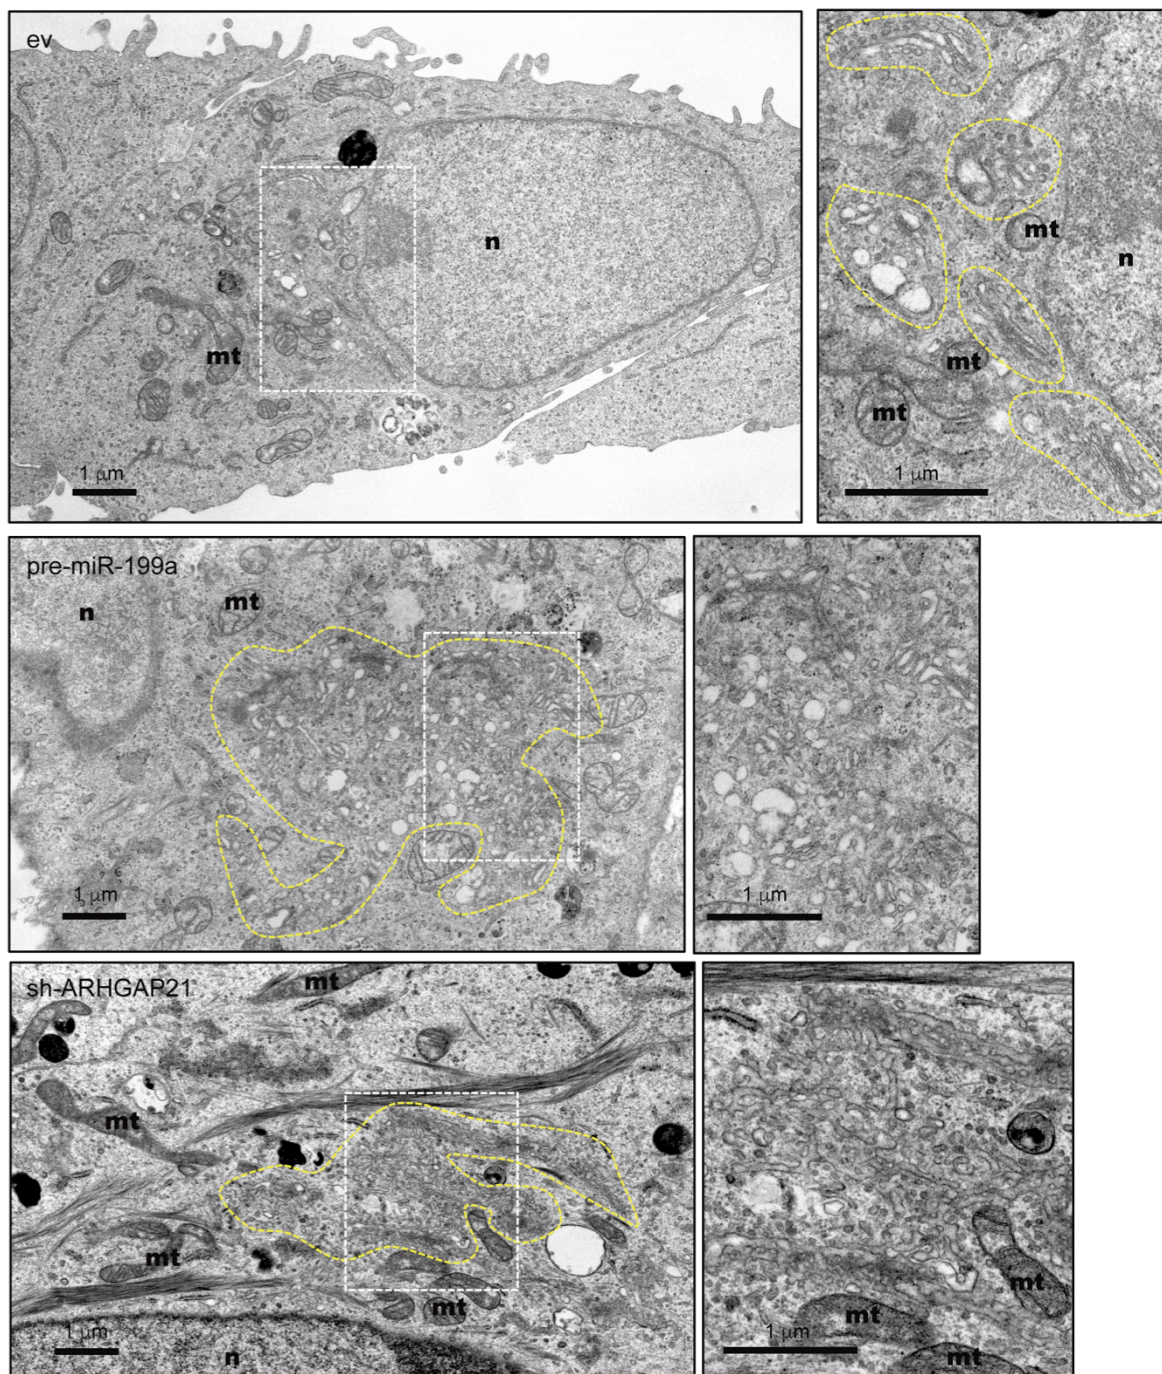

**Supplementary Figure S4 Additional TEM images of the Golgi apparatus.**

Representative transmission electron micrographs of A549 cells transduced with control (ev)-, and pre-miR-199a,- sh-ARHGAP21#01-expressing lentivirus vector. the areas enclosed by



the dashed yellow lines indicate the Golgi apparatus. The right panels show magnifications of the areas boxed with white dashed lines in the left panels. n, nucleus; mt, mitochondria.

**Supplementary Table S1 Summary of TEM analysis**

| Cells   |                | No. of enveloped capsids in cytoplasm (%) | No. of non-enveloped capsids in cytoplasm (%) | No. of analyzed cells* |
|---------|----------------|-------------------------------------------|-----------------------------------------------|------------------------|
| A549    | ev             | 519 (80.3)                                | 127 (19.7)                                    | 15                     |
|         | pre-miR-199a   | 332 (59.4)                                | 227 (40.6)                                    | 16                     |
|         | sh-control     | 177 (74.4)                                | 61 (25.6)                                     | 10                     |
|         | sh-ARHGAP21 #1 | 104 (35.1)                                | 192 (64.9)                                    | 18                     |
|         | sh-ARHGAP21 #2 | 38 (29.0)                                 | 93 (71.0)                                     | 11                     |
|         | sh-ARHGAP21 #3 | 71 (58.7)                                 | 50 (41.3)                                     | 12                     |
|         | control        | 116 (67.4)                                | 56 (32.6)                                     | 11                     |
|         | Cdc42 WT       | 82 (64.1)                                 | 46 (35.9)                                     | 10                     |
|         | Cdc42 CA       | 57 (41.3)                                 | 81 (58.7)                                     | 12                     |
| H522    | 43 (33.6)      | 85 (66.4)                                 | 10                                            |                        |
| SW13    | 141 (34.9)     | 263 (65.1)                                | 11                                            |                        |
| H1299   | 159 (53.4)     | 139 (46.6)                                | 11                                            |                        |
| HeLa S3 | 84 (53.2)      | 74 (46.8)                                 | 10                                            |                        |
| AZ521   | 109 (18.9)     | 468 (81.1)                                | 10                                            |                        |
| A549    | 253 (59.8)     | 170 (40.2)                                | 10                                            |                        |

\* 2 – 4 independent cellular samples were analyzed.

**Supplementary Table S2 List of oligonucleotides used to construct shRNA, TuD RNA, and an epitope tag.**

| shRNA and TuD   | Sense                                                                                      | Antisense                                                                             |
|-----------------|--------------------------------------------------------------------------------------------|---------------------------------------------------------------------------------------|
| sh-ARHGAP21 #01 | tttgaagattagatagtttaagagcttctgtcactcttaaact<br>atctaactttcttttttg                          | aattcaaaaagaaagattagatagtttaagagtgacaggaa<br>gctctaaactatctaactttt                    |
| sh-ARHGAP21 #02 | tttgataacttacttaccattgaatgcttctgtcacattcaatgta<br>agtaagttatcttttttg                       | aattcaaaaagataacttacttaccattgaatgtgacagggaag<br>cattcaatgtaagtaagttat                 |
| sh-ARHGAP21 #03 | tttgatttgccttcttctgtcagcttctgtcactgacaaaga<br>agggacaaatccttttttg                          | aattcaaaaaggatttgccttcttctgtcagtgacagggaag<br>ctgacaaagaaggacaaatc                    |
| TuD-miR-214     | catcaaacctgcctgtctgtcttctgcctgtcaagtattctg<br>gtcacagaatacaaacctgcctgtctgtcttctgcctgtctgca | tcatcttgacagcaggcagaagcagacaggcagtggttatt<br>ctgtgaccagaatacttgacagcaggcagaagcagacagg |
| FLAG tag        | ag<br>gatccgccaccatggactacaagacgatgacgacaagg                                               | cagtggt<br>aattccttgcgtcatcgtctttgtagtccatgggtggcg                                    |

**Supplementary Table S3 List of primer pairs used for PCR cloning.**

| PCR                 | Forward                                                                                                      | Reverse                                                                                           |
|---------------------|--------------------------------------------------------------------------------------------------------------|---------------------------------------------------------------------------------------------------|
| pre-miR-214         | gaagactgtttgaaacctgaaggaaccaagggcctggctggacag<br>agttgcatgtgtctgcctgtctacactgctgtgcagaacatccgctca<br>cctgtac | gaattcagggtgctttcttcaatggctgggtgcatcaggctgggtt<br>gtcatgtgactgcctgtctgtgcctgtctacaggtgagcggatgttc |
| CDC42 (CDS)         | cggaattcatgcagacaattaagtgtgttggtg                                                                            | ccgctcgagtcatagcagcacacacctgc                                                                     |
| eGFP (CDS)          | cgggatccgtgagcaagggcgaggagc                                                                                  | ccgctcgagctgtacagctcgtccatgccg                                                                    |
| ARHGAP21<br>(3'UTR) | attctaggcgcactgcactgggggtatgtccactctagc                                                                      | tttattgggccagctccagtgttaattgggtatgcacacag                                                         |

**Supplementary Table S4 List of primer pairs used for site-directed point mutagenesis.**

| mutagenesis             | Forward                     | Reverse                  |
|-------------------------|-----------------------------|--------------------------|
| Cdc42 CA (Q61L)         | ctagaggattatgacagattacgaccg | ccctgcagtatcaaaaagtccaag |
| ARHGAP21 (3'UTR) 3p mut | ataagccagaagaacatatatatata  | gtaatgcactgtaaagctattcac |
| ARHGAP21 (3'UTR) 5p mut | agctgagctggccgcaataaaatc    | gtttaattgggatgcacacagg   |



**Supplementary Table S5 List of primer pairs used for qPCR.**

| qPCR                 | Forward                   | Reverse              |
|----------------------|---------------------------|----------------------|
| <i>ARHGAP21</i>      | catctgaagacagtggcaga      | agtcatggtgctggatgagc |
| <i>GAPDH</i>         | ctctgctcctcctgttcgac      | ttaaaagcagccctggtgac |
| <i>RNAI8S5</i>       | gaaacttaaaggaattgacggaagg | ggtgaggttcccgtg      |
| ICP0 ( <i>RL2</i> )  | cgtgaacaagacgatcacgg      | atgttcccgtctggtccac  |
| ICP4 ( <i>RS1</i> )  | gtcgatgcttgggtgggaaa      | gccagagacagaccgtcaga |
| ICP8 ( <i>UL29</i> ) | gttacctgtccgagcctcc       | cgacctcaaacacgagacga |
| vhs ( <i>UL41</i> )  | gggaatgtagcagcgctaa       | tgcccaacctctatcacac  |
| gD ( <i>US6</i> )    | cgtccggaaacaaccctaca      | ccaggttatcctcgetgac  |
